# Supplementary material for: Glue-like passivation by the natural alkene lycopene for efficient and stable perovskite solar cells: insights from a theoretical perspective
Source: Royal Society of Chemistry journal article supplement (doi:10.1039/d3tc03966h), 2024-01-01
Supplement: d3tc03966h1.pdf [file d3tc03966h1.pdf]

## Supporting Information

### **Glue-like passivation of natural alkene lycopene for efficient and stable perovskite solar cells: insight from a theoretical perspective**

Na Chen, Quan-Song Li\*

Key Laboratory of Cluster Science of Ministry of Education

Beijing Key Laboratory of Photoelectronic/Electrophotonic Conversion Materials

School of Chemistry and Chemical Engineering

Beijing Institute of Technology, 100081 Beijing, China

E-mail: [liquansong@bit.edu.cn](mailto:liquansong@bit.edu.cn)

## Contents

|                                                                                                                                                             |   |
|-------------------------------------------------------------------------------------------------------------------------------------------------------------|---|
| <b>Figure S1.</b> Slab models of PbI <sub>2</sub> - and MAI-terminated surfaces of MAPbI <sub>3</sub> .....                                                 | 2 |
| <b>Figure S2.</b> The planar-averaged charge density difference for LP@MAPbI <sub>3</sub> -I <sub>v</sub> .....                                             | 3 |
| <b>Figure S3.</b> Charge densities of VBM and CBM .....                                                                                                     | 4 |
| <b>Figure S4.</b> The configurations for O <sub>2</sub> @MAPbI <sub>3</sub> -I <sub>v</sub> and LP-O <sub>2</sub> @MAPbI <sub>3</sub> -I <sub>v</sub> ..... | 5 |
| <b>Figure S5.</b> Evolution of the energy and temperature fluctuations .....                                                                                | 6 |
| <b>Figure S6.</b> Snapshots of AIMD simulations .....                                                                                                       | 7 |

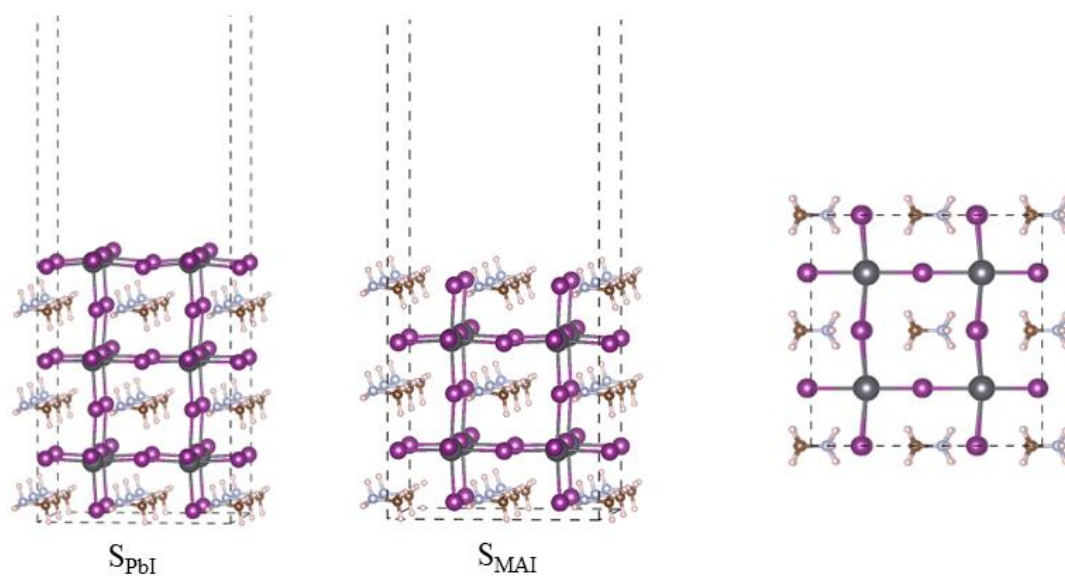

Figure S1. Side and top views of slab models of  $\text{PbI}_2$ -terminated ( $S_{\text{PbI}}$ ) and MAI-terminated ( $S_{\text{MAI}}$ ) (001) surfaces of  $\text{MAPbI}_3$ .

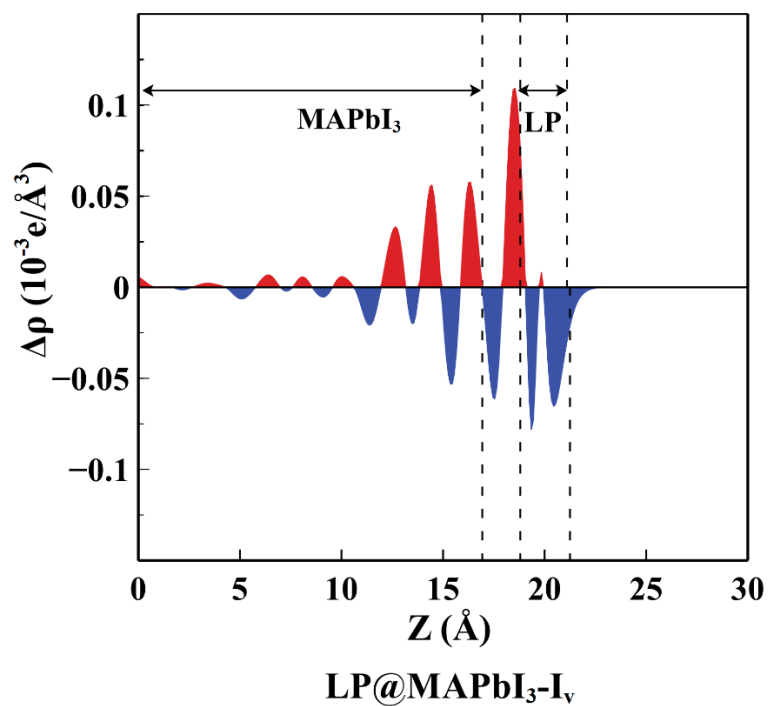

Figure S2. The planar-averaged charge density difference for LP@MAPbI<sub>3</sub>-I<sub>v</sub> along z direction. The positive value suggests the charge accumulation, and the negative value refers to the charge depletion.

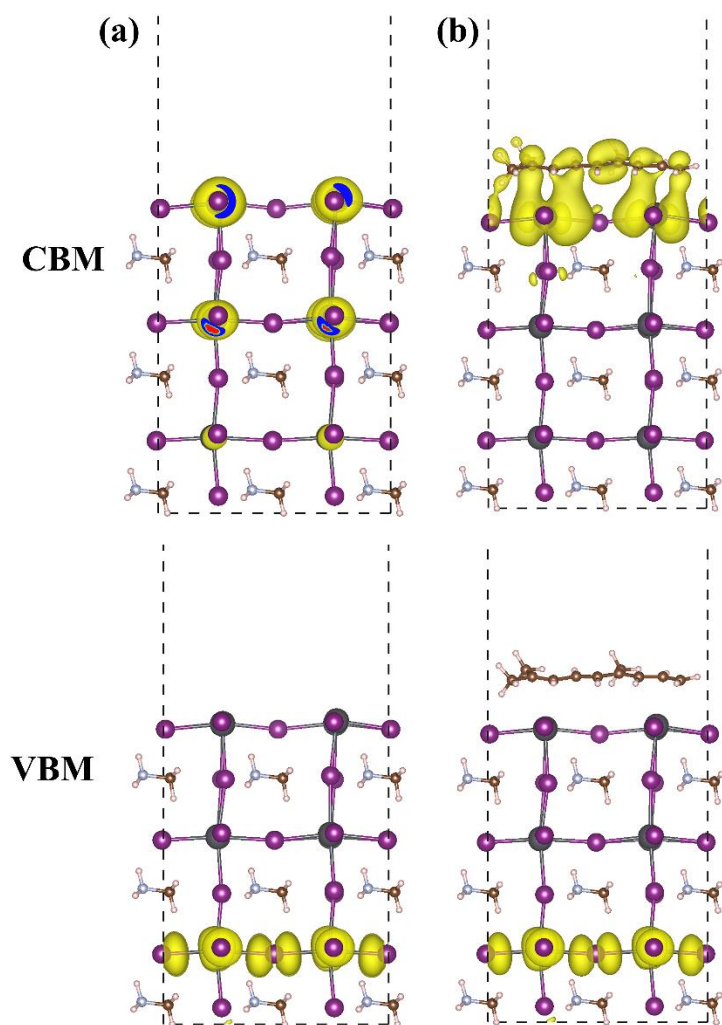

Figure S3. Charge densities of CBM and VBM for (a) MAPbI<sub>3</sub>-I<sub>v</sub> and (b) LP@MAPbI<sub>3</sub>-I<sub>v</sub>. The isosurface level is 0.0008 e/Bohr<sup>3</sup>.

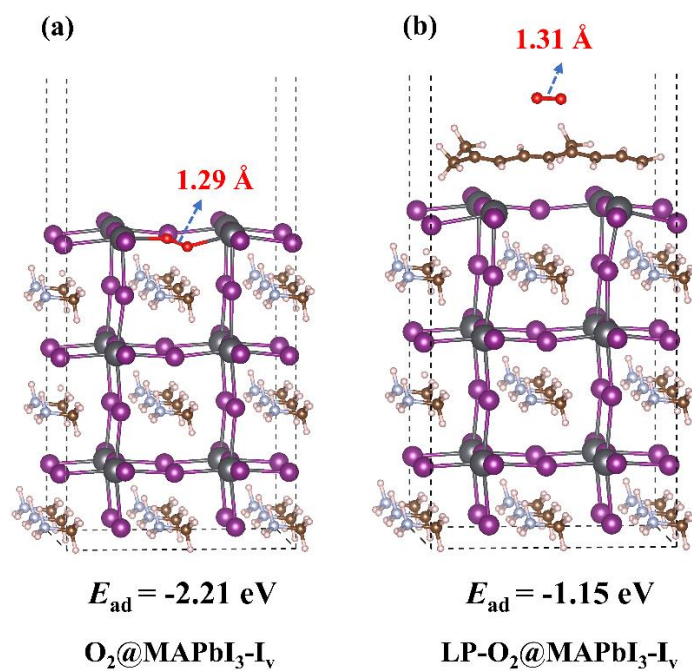

Figure S4. The side and top views of optimized configurations for (a)  $\text{O}_2@\text{MAPbI}_3\text{-I}_v$  and (b)  $\text{LP-O}_2@\text{MAPbI}_3\text{-I}_v$ .

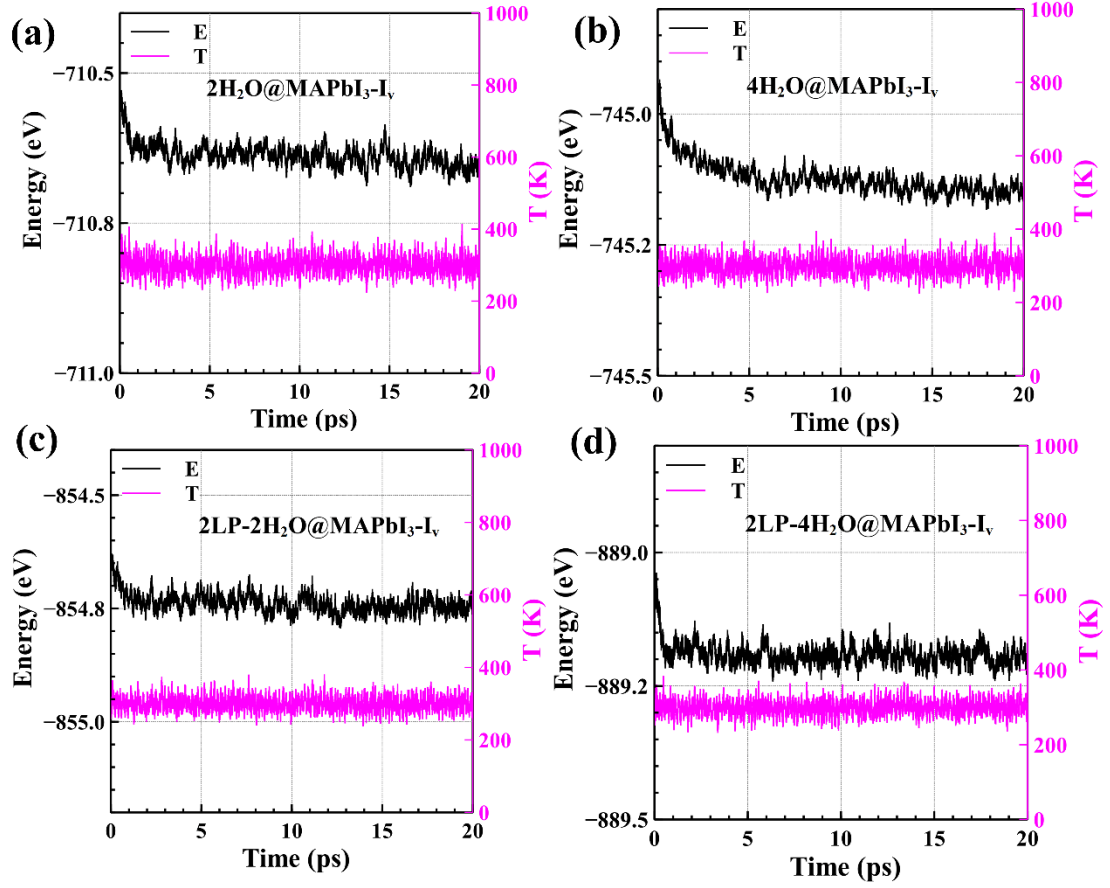

Figure S5. Energy evolution and temperature fluctuation for (a)  $2\text{H}_2\text{O}@MAPbI_3-I_v$ , (b)  $4\text{H}_2\text{O}@MAPbI_3-I_v$ , (c)  $2\text{LP}-2\text{H}_2\text{O}@MAPbI_3-I_v$  and (d)  $2\text{LP}-4\text{H}_2\text{O}@MAPbI_3-I_v$  systems.

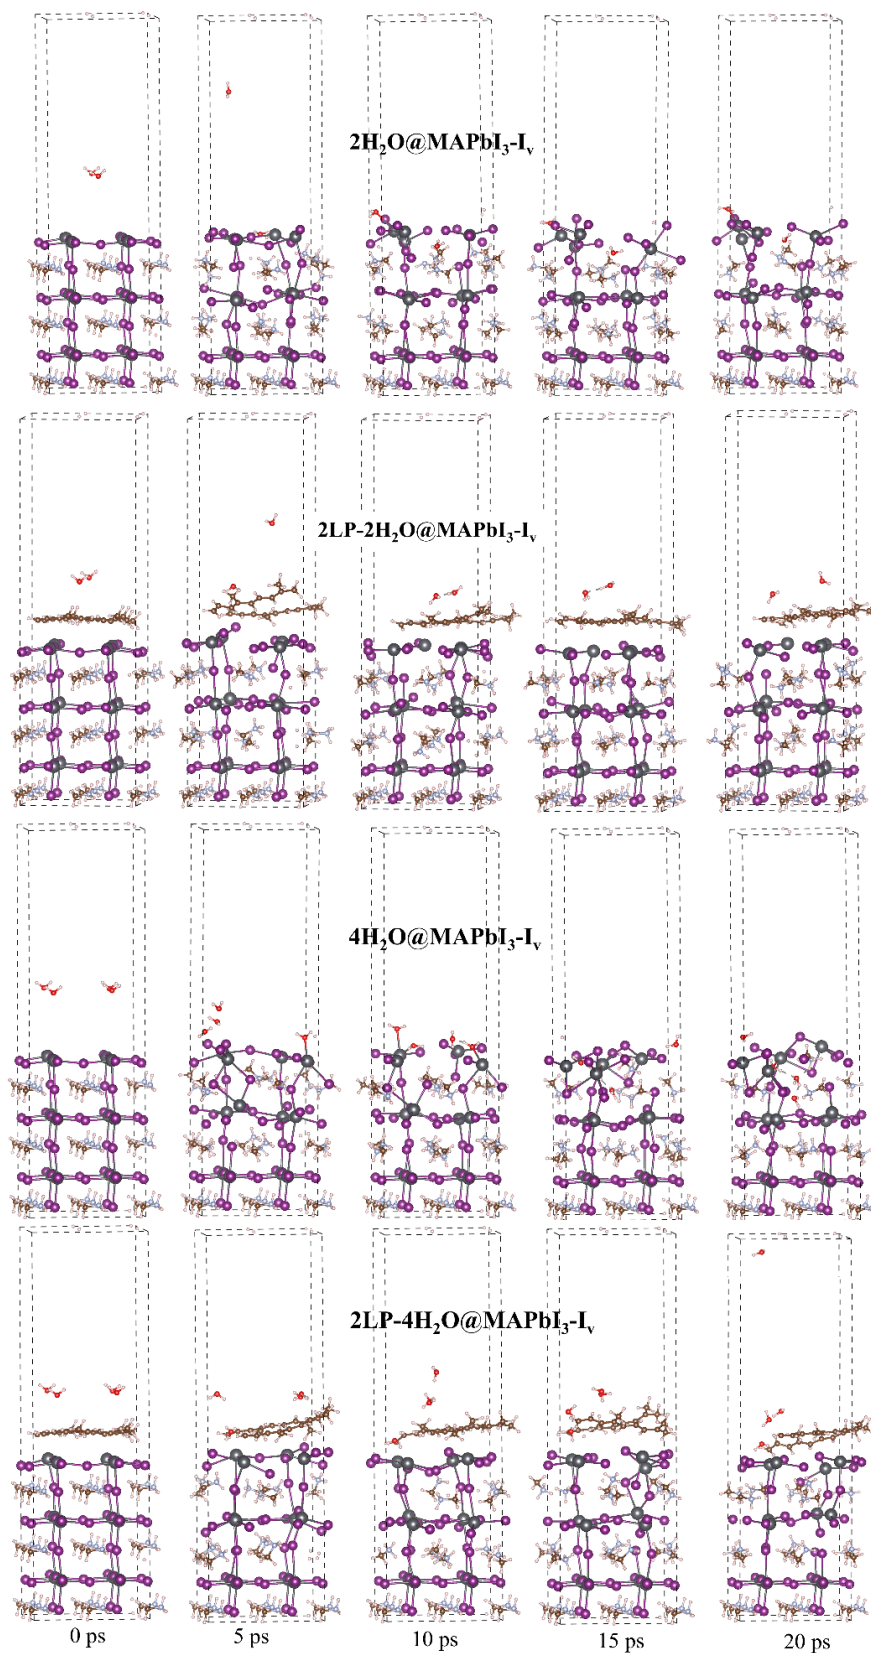

Figure S6. Snapshots of AIMD simulations at 0, 5, 10, 15, and 20 ps for  $2\text{H}_2\text{O}@ \text{MAPbI}_3\text{-I}_v$ ,  $2\text{LP-}2\text{H}_2\text{O}@ \text{MAPbI}_3\text{-I}_v$ ,  $4\text{H}_2\text{O}@ \text{MAPbI}_3\text{-I}_v$ , and  $2\text{LP-}4\text{H}_2\text{O}@ \text{MAPbI}_3\text{-I}_v$ .
